# Supplementary material for: Development of a range of fluorescent reagentless biosensors for ATP, based on malonyl-coenzyme A synthetase
Source: PLOS journal article supplement (doi:10.1371/journal.pone.0179547), 2017-06-21

**S2 Fig. Absorbance spectra of variants of Rho-MatB with and without ATP**

(A) 1  $\mu$ M Rho-MatB T167A with and without 5 mM ATP; (B) 1  $\mu$ M Rho-MatB T303A with and without 3 mM ATP; (C) 1  $\mu$ M Rho-MatB S170A with and without 0.5 mM ATP. These ATP concentrations were saturating for the variant. Solutions were in 50 mM Hepes pH 7.0, 100 mM NaCl, 10 mM  $\text{MgCl}_2$ , 0.3  $\text{mg ml}^{-1}$  bovine serum albumin at 20  $^{\circ}\text{C}$ .

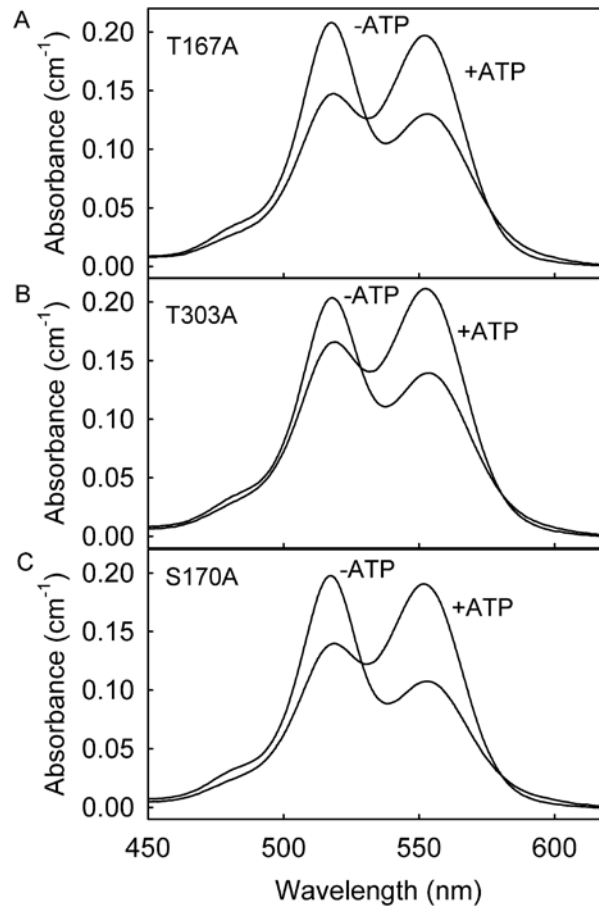

Supplement: S2 (10.1371/journal.pone.0179547.s002) [file journal.pone.0179547.s002]
